# Supplementary material for: Association of Integrating Mental Health Into Pediatric Primary Care at Federally Qualified Health Centers With Utilization and Follow-up Care
Source: PubMed Central journal article supplement (PMC10134009; doi:10.1001/jamanetworkopen.2023.9990), 2023-04-26
Supplement: jamanetwopen-e239990-s001.pdf [file jamanetwopen-e239990-s001.pdf]

## Supplemental Online Content

Kim J, Sheldrick RC, Gallagher K, et al. Association of integrating mental health into pediatric primary care at federally qualified health centers with utilization and follow-up care. *JAMA Network Open*. 2023;6(4):e239990. doi:10.1001/jamanetworkopen.2023.9990

**eAppendix.** Selection Procedure of Six Comparison FQHCs

**eTable 1.** Definitions of Study Outcomes

**eTable 2.** Classification of Psychotropic Medication Types

**eTable 3.** Baseline Patient Characteristics Among Those With Baseline Mental Health Diagnosis Between TEAM UP and Comparison FQHCs

**eTable 4.** Association Between TEAM UP and Health Care Utilization and Follow-up Care Measures Among Medicaid Enrollees by Age Group: Difference-in-Differences Results

**eTable 5.** Distribution of the Mean Number of Visits per Patient per Quarter

**eTable 6.** Distribution of the Mean Number of Visits With Mental Health Service Use per Patient per Quarter

**eTable 7.** Association Between TEAM UP and Whether or Not Patients Used “Any MH Service” Reported as %: Difference-in-Differences Results

**eTable 8.** Association Between TEAM UP and Whether or Not Patients Had “Any MH Service” as % Among Medicaid Enrollees With Any Mental Health Diagnosis at Baseline: Difference-in-Differences Results

**eFigure 1.** Time Trends in Inpatient Admissions Among Medicaid-Enrolled Children

**eFigure 2.** Time Trends in Inpatient Admissions Among Medicaid-Enrolled Children With a Baseline Mental Health Diagnosis

**eFigure 3.** Time Trends in Emergency Department Visits Among Medicaid-Enrolled Children

**eFigure 4.** Time Trends in Emergency Department Visits Among Medicaid-Enrolled Children With a Baseline Mental Health Diagnosis

**eFigure 5.** Time Trends in Primary Care Visits Among Medicaid-Enrolled Children

**eFigure 6.** Time Trends in Primary Care Visits Among Medicaid-Enrolled Children With a Baseline Mental Health Diagnosis

**eFigure 7.** Time Trends in Any Mental Health Service Utilization Among Medicaid-Enrolled Children

**eFigure 8.** Time Trends in Mental Health Therapy Utilization Among Medicaid-Enrolled Children

**eFigure 9.** Time Trends in Mental Health Consultation Utilization Among Medicaid-Enrolled Children

**eFigure 10.** Time Trends in Mental Health Testing Utilization Among Medicaid-Enrolled Children

**eFigure 11.** Time Trends in Mental Health Screening Utilization Among Medicaid-Enrolled Children

**eFigure 12.** Time Trends of Any Psychotropic Medication Use (>0% of Days in Quarter) Among Medicaid-Enrolled Children

**eFigure 13.** Time Trends of Any Stimulant Use Among Medicaid-Enrolled Children

**eFigure 14.** Time Trends of Polypharmacy (Having > 1 Class of Psychotropic Medication) Among Medicaid-Enrolled Children

**eFigure 15.** Time Trends of 7-Days FU After ED Visit for MH/Intentional Self-Harm DX (Primary)

**eFigure 16.** Time Trends of 7-Days FU After Hospitalization for MH DX (Primary)

This supplemental material has been provided by the authors to give readers additional information about their work.

## **eAppendix. Selection Procedure of Six Comparison FQHCs**

Comparison FQHCs were selected by a third party (data vendor), in conjunction with our research team, based on key FQHC characteristics: geographic location (i.e. proximity to a TEAM UP FQHC), size (i.e. number of unique patients served), and patient demographics based on race/ethnicity (percent patients who are white, non-Hispanic; Black, non-Hispanic, Hispanic), age, sex, primary language, income level (percent below poverty level), and insurance coverage types (e.g., percent Medicaid-enrolled). This selection process was done using a matching algorithm. The pool of available comparison site FQHCs was limited to those in Massachusetts and within 10 miles of a TEAM UP FQHC. Using this approach, the comparison group was pre-specified: this selection process for comparison site FQHCs was conducted in 2017—the beginning of this research study and years before we initiated these analyses. Pre-selecting comparison site FQHCs allowed us to develop detailed directories of all providers at each FQHC and in turn, this allowed us to attribute children to these FQHCs in the claims data. The same set of comparison site FQHC was also used in an earlier TEAM UP manuscript (Cole et al., 2019) – for more details on the characteristics of TEAM UP vs comparison site FQHCs, please see Cole et al, 2019, supplemental appendix.

**eTable 1. Definitions of Study Outcomes**

| Variable name                                 | Description                                                                                                                                                                                                                                                                             | Identification Codes                                                                                                                                                                                                                                                                                                                                                                                                                    |
|-----------------------------------------------|-----------------------------------------------------------------------------------------------------------------------------------------------------------------------------------------------------------------------------------------------------------------------------------------|-----------------------------------------------------------------------------------------------------------------------------------------------------------------------------------------------------------------------------------------------------------------------------------------------------------------------------------------------------------------------------------------------------------------------------------------|
| <i>Utilization outcomes</i>                   |                                                                                                                                                                                                                                                                                         |                                                                                                                                                                                                                                                                                                                                                                                                                                         |
| ED visits                                     | Visits where patients receive care from emergency department                                                                                                                                                                                                                            | Revenue code (REV): 0450,0451,0452, 0453, 0454, 0455, 0456, 0457, 0458, 0459, 0981 Place of service (POS): 23 CPT code: 99281, 99282, 99283, 99284, 99285                                                                                                                                                                                                                                                                               |
| Inpatient admissions                          | Visits where patients are admitted to the hospital and have at least one overnight stay                                                                                                                                                                                                 | Admission date (ADMDAT): populated Discharge date (DISDAT): populated Revenue code (REV): 100-219 Place of service (POS): 21, 31, 32, 33, 34, 51, 56, 61 Bill type (BILLTYPE): 12, 12, 21, 22, 32, 41 Discharge status (DISSTATUS): 30                                                                                                                                                                                                  |
| Primary care visits                           | Visits where patients receive care from primary care provider or have primary care services                                                                                                                                                                                             | Claim type (CLMTYP): 1 PCP provider indicator (PCP_IND): yes PCP service indicator (PCP_FLAG): yes                                                                                                                                                                                                                                                                                                                                      |
| <i>Mental health service use</i>              |                                                                                                                                                                                                                                                                                         |                                                                                                                                                                                                                                                                                                                                                                                                                                         |
| Any MH service                                | Use of any mental health service                                                                                                                                                                                                                                                        | Any mental health service based on CPT and REV codes below for sub-categories of MH service use                                                                                                                                                                                                                                                                                                                                         |
| MH service: Therapy                           | Use of behavioral health intake or evaluation, psychotherapy, psychotherapy crisis or crisis intervention, secondary behavioral health service, group therapy, other therapeutic BH service, family training and counseling, or outpatient behavioral health services or accommodations | BH intake /evaluation: 90791; 90791 HA; 90792; 90801; 90802 Psychotherapy: 90832-90838; 90846-90847; 90849; 90804-90808; 90816; 90818; 90821 Psychotherapy crisis/crisis intervention: 90839-90840; H2011 Secondary BH service: 96150-96155 Group therapy: 90853 Other therapeutic BH service: H2019, H2020 Family training and counseling: T1027 Outpatient behavioral health services or accommodations: REV codes 900-919; 1000-1005 |
| MH service: Consultation                      | Use of family consultation or outside consultation                                                                                                                                                                                                                                      | Family consultation: 90887 Outside consultation: 90882; H0046; H0032                                                                                                                                                                                                                                                                                                                                                                    |
| MH service: MH screening                      | Use of behavioral health screening                                                                                                                                                                                                                                                      | 96110                                                                                                                                                                                                                                                                                                                                                                                                                                   |
| MH service: MH testing                        | Use of behavioral health testing or psychological testing or assessment                                                                                                                                                                                                                 | MH testing: 96111 Psychological testing or assessment: 96101, 96102, 96103, 96105, 96111, 96116, 96118, 96119, 96120, 96130-96139, 96146                                                                                                                                                                                                                                                                                                |
| <i>Psychotropic medication use</i>            |                                                                                                                                                                                                                                                                                         |                                                                                                                                                                                                                                                                                                                                                                                                                                         |
| Any psychotropic medication use (>0% of days) | Use of any psychotropic medication                                                                                                                                                                                                                                                      | National drug codes (NDC) for psychotropic medication listed in below supplemental table                                                                                                                                                                                                                                                                                                                                                |
| Any stimulant medication use (>0% of days)    | Use of any stimulant medication                                                                                                                                                                                                                                                         | National drug codes (NDC) for stimulant medication listed in below supplemental table                                                                                                                                                                                                                                                                                                                                                   |

|                                                        |                                                                                                                                                                                                                                        |                                                                                                                                                                                                                                        |
|--------------------------------------------------------|----------------------------------------------------------------------------------------------------------------------------------------------------------------------------------------------------------------------------------------|----------------------------------------------------------------------------------------------------------------------------------------------------------------------------------------------------------------------------------------|
| Polypharmacy (2+ psychotropic medications)             | Use of 2 or more types of psychotropic medications                                                                                                                                                                                     | National drug codes (NDC) for psychotropic medication listed in below supplemental table                                                                                                                                               |
| <i>Quality of care</i>                                 |                                                                                                                                                                                                                                        |                                                                                                                                                                                                                                        |
| Follow-up visit after MH ED visit (MH or self-harm DX) | The percentage of ED visits for members ages 6 to 21 with a principal diagnosis of mental illness or intentional self-harm, who had a follow-up visit for mental illness within 7 days of the ED visit                                 | Revenue code (REV): 0450,0451,0452, 0453, 0454, 0455, 0456, 0457, 0458, 0459, 0981 Place of service (POS): 23 CPT code: 99281, 99282, 99283, 99284, 99285                                                                              |
| Follow-up visit after MH hospitalization (MH DX)       | The percentage of discharges for members 6 to 21 years of age who were hospitalized for treatment of selected mental illness diagnosis and who received a follow-up visit with a mental health practitioner within 7 days of discharge | Admission date (ADMDAT): populated Discharge date (DISDAT): populated Revenue code (REV): 100-219 Place of service (POS): 21, 31, 32, 33, 34, 51, 56, 61 Bill type (BILLTYPE): 12, 12, 21, 22, 32, 41 Discharge status (DISSTATUS): 30 |
| <i>Other</i>                                           |                                                                                                                                                                                                                                        |                                                                                                                                                                                                                                        |
| Mental health diagnosis                                | Mental health diagnosis                                                                                                                                                                                                                | Diagnosis code (DX): Any ICD9 or ICD10 code for mental health disorder based on 640 HEDIS codes (366 ICD-9 and 274 ICD-10)                                                                                                             |

Note: To establish inpatient visits, all claims during the inpatient stay are collapsed into a single visit. To establish all other visits, all claims from the same provider (rendering or billing) on the same day are collapsed. MH service use flags will overlay the utilization variables. For each visit, a 0 or 1 will indicate if any MH service was provided or if any of the specific MH services were provided. As with the utilization variables, when collapsed at the person-quarter level, each row of data will sum up the total number of each service provided in that quarter.

**eTable 2. Classification of Psychotropic Medication Types**

| <b>Class of drugs</b>                     | <b>Diagnosis</b>                                                    | <b>Medication names</b>                                                                                                                                                                                                                                                                                                                                                                                                             |
|-------------------------------------------|---------------------------------------------------------------------|-------------------------------------------------------------------------------------------------------------------------------------------------------------------------------------------------------------------------------------------------------------------------------------------------------------------------------------------------------------------------------------------------------------------------------------|
| Stimulants                                | Hyperactivity, inattention, impulsivity                             | Amphetamine/dextroamphetamine combination (Adderall), Amphetamine/dextroamphetamine combination (Adderall XR), Dexamethylphenidate (Focalin), Dexamethylphenidate (Focalin XR), Dextroamphetamine (Dexedrine), Dextroamphetamine (Dexedrine Spansule), Lisdexamfetamine (Vyvanse), Methylphenidate (Metadate ER, Metadate CD, Methylin ER, Ritalin LA, Ritalin SR), Methylphenidate (Ritalin, Methylin), Methylphenidate (Concerta) |
| SNRI                                      | Inattention, hyperactivity, impulsivity (2 <sup>nd</sup> line ADHD) | Atomoxetine (Strattera)                                                                                                                                                                                                                                                                                                                                                                                                             |
| Atypical Antipsychotic                    | Mania, psychosis, aggression                                        | Aripiprazole (Abilify), Risperidone (Risperdal), Quetiapine (Seroquel), Olanzapine (Zyprexa), Ziprasidone (Geodon)                                                                                                                                                                                                                                                                                                                  |
| Typical Antipsychotics                    | Psychosis, aggression                                               | Chlorpromazine (Thorazine), Haloperidol (Haldol), Clozapine (Clozaril)                                                                                                                                                                                                                                                                                                                                                              |
| 1 <sup>st</sup> Line Antidepressant SSRIs | Depression, anxiety                                                 | Fluoxetine (Prozac), Escitalopram (Lexapro), Citalopram (Celexa), Sertraline (Zoloft)                                                                                                                                                                                                                                                                                                                                               |
| Atypical Antidepressants-SNRIs            | Depression, anxiety                                                 | Bupropion XR (Wellbutrin XL), Bupropion SR (Wellbutrin SR), Bupropion (Wellbutrin), Venlafaxine (Effexor XR), Duloxetine (Cymbalta)                                                                                                                                                                                                                                                                                                 |
| Tricyclic Antidepressants                 | Anxiety                                                             | Clomipramine (Anafranil)                                                                                                                                                                                                                                                                                                                                                                                                            |
| Anxiolytic                                | Anxiety                                                             | Buspirone (BuSpar), Hydroxyzine (Vistaril), Clonazepam (Klonopin), Lorazepam (Ativan)                                                                                                                                                                                                                                                                                                                                               |
| Alpha Agonists                            |                                                                     | Clonidine (Catapres), Clonidine (NOS), Guanfacine (NOS), Guanfacine (Intuniv), Guanfacine (Tenex), Clonidine (Kapvay)                                                                                                                                                                                                                                                                                                               |
| Mood Stabilizers                          |                                                                     | Divalproex (Depakote), Divalproex (Depakote ER), Lamotrigine (Lamictal), Lithium carbonate (Eskalith, Eskalith CR, Lithobid)                                                                                                                                                                                                                                                                                                        |
| Mood stabilizers/Aggression               |                                                                     | Carbamazepine (Tegretol), Oxcarbazepine (Trileptal)                                                                                                                                                                                                                                                                                                                                                                                 |
| Other                                     |                                                                     | Gabapentin (Neurontin) (Anticonvulsant, also used for pain, sleep in adolescents), Topiramate (Topamax) (Anticonvulsant, also used for pain, sleep in adolescents)                                                                                                                                                                                                                                                                  |

Note: Polypharmacy was defined as having 2 or more classes of prescription within a quarter.

**eTable 3. Baseline Patient Characteristics Among Those With Baseline Mental Health Diagnosis Between TEAM UP and Comparison FQHCs**

|                                                      | Full Sample<br>(N= 46,176<br>person-<br>quarters) | TEAM UP<br>FQHCs<br>(N= 19,289<br>person-<br>quarters) | Comparison<br>Group<br>FQHCs<br>(N= 26,887<br>person-<br>quarters) | Std.<br>Diff. |
|------------------------------------------------------|---------------------------------------------------|--------------------------------------------------------|--------------------------------------------------------------------|---------------|
| <b>Age, Mean (SD)</b>                                | 9.0 (3.9)                                         | 9.0 (3.8)                                              | 9.0 (4.0)                                                          | -0.019        |
| <b>Female, N (%)</b>                                 | 1,425 (43.8%)                                     | 583 (43.8%)                                            | 842 (43.8%)                                                        | 0.000         |
| <b>Select conditions, N (%)</b>                      |                                                   |                                                        |                                                                    |               |
| Any mental health disorder                           | 3,251 (100%)                                      | 1,330 (100%)                                           | 1,921 (100%)                                                       | N/A           |
| Asthma                                               | 1,139 (35.0%)                                     | 557 (41.9%)                                            | 582 (30.3%)                                                        | -0.243        |
| Trauma- and stressor-related disorders               | 1,530 (47.1%)                                     | 649 (48.8%)                                            | 881 (45.9%)                                                        | -0.059        |
| Attention Deficit Hyperactivity Disorder             | 1,228 (37.8%)                                     | 534 (40.2%)                                            | 694 (36.1%)                                                        | -0.083        |
| Depressive disorders                                 | 977 (30.1%)                                       | 424 (31.9%)                                            | 553 (28.8%)                                                        | -0.067        |
| Disruptive, impulse-control, and conduct disorder    | 921 (28.3%)                                       | 424 (31.9%)                                            | 497 (25.9%)                                                        | -0.133        |
| Anxiety disorders                                    | 652 (20.1%)                                       | 287 (21.6%)                                            | 365 (19.0%)                                                        | -0.064        |
| Other mood disorder                                  | 544 (16.7%)                                       | 259 (19.5%)                                            | 285 (14.8%)                                                        | -0.123        |
| Autism spectrum disorder or Asperger's syndrome      | 226 (7.0%)                                        | 85 (6.4%)                                              | 141 (7.3%)                                                         | 0.038         |
| Schizophrenia spectrum and other psychotic disorders | 185 (5.7%)                                        | 79 (5.9%)                                              | 106 (5.5%)                                                         | -0.018        |
| Bipolar and related disorders                        | 134 (4.1%)                                        | 62 (4.7%)                                              | 72 (3.7%)                                                          | -0.046        |
| Other mental health conditions                       | 211 (6.5%)                                        | 84 (6.3%)                                              | 127 (6.6%)                                                         | 0.012         |
| <b>Zip-code level characteristics, Mean (SD)</b>     |                                                   |                                                        |                                                                    |               |
| Median income in zip code (\$)                       | \$54,055<br>(\$19,698)                            | \$51,500<br>(\$16,503)                                 | \$55,823<br>(\$21,462)                                             | 0.226         |
| % non-White                                          | 49.5% (22.5%)                                     | 52.7%<br>(24.0%)                                       | 47.2%<br>(21.2%)                                                   | -0.241        |
| % speaking language other than English               | 46.2% (19.5%)                                     | 40.0% (9.6%)                                           | 50.5%<br>(23.1%)                                                   | 0.594         |
| % below poverty line                                 | 18.1% (6.7%)                                      | 18.4% (6.1%)                                           | 17.9% (7.0%)                                                       | -0.075        |
| <b>Medicaid, N (%)</b>                               | 3,251 (100%)                                      | 1,330 (100%)                                           | 1,921 (100%)                                                       | N/A           |
| <b>FQHC is primary site of primary care, N (%)</b>   | 3,251 (100%)                                      | 1,330 (100%)                                           | 1,921 (100%)                                                       | N/A           |

Abbreviations: FQHC, Federally Qualified Health Center

Note: Our final sample throughout the whole study period included 46,176 person-quarters, where 19,289 person-quarters were in the treatment group and 26,887 person-quarters were in the comparison group. For baseline patient characteristics, only 2014q1 data were used, with 1,330 persons from TEAM UP FQHCs and 1,921 persons from comparison group FQHCs, making total 3,251 persons.

**eTable 4. Association Between TEAM UP and Health Care Utilization and Follow-up Care Measures Among Medicaid Enrollees by Age Group: Difference-in-Differences Results**

|                                               | TEAM UP FQHCs |       | Comparison FQHCs |       | DID             |                   |
|-----------------------------------------------|---------------|-------|------------------|-------|-----------------|-------------------|
|                                               | Pre           | Post  | Pre              | Post  | Marginal effect | 95% CI            |
| <b>N (person-quarters)</b>                    |               |       |                  |       |                 |                   |
| <b>Utilization, per 1000 patients/quarter</b> |               |       |                  |       |                 |                   |
| <b>Avoidable utilization</b>                  |               |       |                  |       |                 |                   |
| Inpatient admissions                          |               |       |                  |       |                 |                   |
| Age 3-4 years                                 | 6.3           | 3.4   | 4.0              | 7.7   | -4.55***        | [-6.97, -2.13]    |
| Age 5-12 years                                | 4.8           | 5.2   | 5.2              | 4.9   | 0.47            | [-1.71, 2.64]     |
| Age 13-17 years                               | 11.2          | 11.2  | 9.9              | 7.8   | 1.82            | [-3.03, 6.68]     |
| With MH DX                                    |               |       |                  |       |                 |                   |
| Age 3-4 years                                 | 0.7           | 0.7   | 0.1              | 1.2   | -1.45           | [-4.40, 1.50]     |
| Age 5-12 years                                | 2.0           | 2.2   | 1.7              | 2.0   | -0.26           | [-1.38, 0.87]     |
| Age 13-17 years                               | 4.4           | 6.5   | 3.2              | 3.5   | 1.18            | [-1.88, 4.23]     |
| Without MH DX                                 |               |       |                  |       |                 |                   |
| Age 3-4 years                                 | 5.7           | 2.7   | 3.9              | 6.6   | -3.94***        | [-6.15, -1.72]    |
| Age 5-12 years                                | 2.8           | 2.9   | 3.5              | 2.9   | 0.73            | [-1.19, 2.65]     |
| Age 13-17 years                               | 6.8           | 4.7   | 6.8              | 4.4   | 0.04            | [-3.41, 3.49]     |
| ED visits                                     |               |       |                  |       |                 |                   |
| Age 3-4 years                                 | 136.1         | 140.8 | 161.2            | 156.8 | 7.26            | [-20.68, 35.20]   |
| Age 5-12 years                                | 100.3         | 101.4 | 118.0            | 109.5 | 8.01            | [-2.77, 18.78]    |
| Age 13-17 years                               | 143.7         | 147.1 | 142.3            | 133.8 | 11.55           | [-6.89, 30.00]    |
| With MH DX                                    |               |       |                  |       |                 |                   |
| Age 3-4 years                                 | 1.9           | 3.4   | 3.2              | 2.3   | 3.23            | [-3.05, 9.52]     |
| Age 5-12 years                                | 7.2           | 5.8   | 7.7              | 6.0   | -0.15           | [-2.64, 2.33]     |
| Age 13-17 years                               | 17.2          | 17.9  | 11.6             | 9.8   | 3.19            | [-2.49, 8.87]     |
| Without MH DX                                 |               |       |                  |       |                 |                   |
| Age 3-4 years                                 | 134.2         | 137.4 | 158.0            | 154.5 | 4.52            | [-22.74, 31.78]   |
| Age 5-12 years                                | 93.1          | 95.6  | 110.3            | 103.5 | 8.51            | [-1.94, 18.96]    |
| Age 13-17 years                               | 126.5         | 129.2 | 130.6            | 124.0 | 9.74            | [-7.61, 27.09]    |
| <b>Other utilization</b>                      |               |       |                  |       |                 |                   |
| PC total visits                               |               |       |                  |       |                 |                   |
| Age 3-4 years                                 | 687.9         | 586.0 | 681.6            | 598.0 | -22.71          | [-89.75, 44.34]   |
| Age 5-12 years                                | 569.8         | 499.9 | 569.6            | 502.9 | -2.39           | [-28.69, 23.91]   |
| Age 13-17 years                               | 596.3         | 467.3 | 547.1            | 500.5 | -79.36***       | [-114.64, -44.08] |
| With MH DX                                    |               |       |                  |       |                 |                   |
| Age 3-4 years                                 | 22.5          | 17.8  | 27.9             | 18.8  | 2.99            | [-8.51, 14.49]    |
| Age 5-12 years                                | 35.1          | 31.9  | 33.3             | 24.4  | 8.56*           | [2.04, 15.07]     |
| Age 13-17 years                               | 30.3          | 22.9  | 27.1             | 22.7  | -3.56           | [-10.05, 2.94]    |



|                                                                  |        |        |        |        |           |                   |  |
|------------------------------------------------------------------|--------|--------|--------|--------|-----------|-------------------|--|
| Without MH DX                                                    |        |        |        |        |           |                   |  |
| Age 3-4 years                                                    | 665.4  | 568.2  | 653.7  | 579.2  | -26.34    | [-91.03, 38.36]   |  |
| Age 5-12 years                                                   | 534.7  | 468.0  | 536.3  | 478.6  | -9.81     | [-34.81, 15.20]   |  |
| Age 13-17 years                                                  | 566.1  | 444.4  | 520.0  | 477.8  | -76.06*** | [-110.08, -42.05] |  |
| <b>Mental health (MH) service use, per 1000 patients/quarter</b> |        |        |        |        |           |                   |  |
| Any service                                                      |        |        |        |        |           |                   |  |
| Age 3-4 years                                                    | 1118.6 | 1306.8 | 794.3  | 963.2  | -134.21*  | [-239.83, -28.58] |  |
| Age 5-12 years                                                   | 2223.4 | 2143.1 | 1898.6 | 1756.9 | 85.74*    | [0.40, 171.09]    |  |
| Age 13-17 years                                                  | 1784.9 | 1720.5 | 1377.6 | 1239.1 | 109.01*   | [2.15, 215.88]    |  |
| Therapy                                                          |        |        |        |        |           |                   |  |
| Age 3-4 years                                                    | 741.6  | 962.7  | 495.0  | 631.0  | -8.56     | [-99.58, 82.47]   |  |
| Age 5-12 years                                                   | 1763.2 | 1716.3 | 1488.1 | 1361.1 | 101.38*   | [19.81, 182.94]   |  |
| Age 13-17 years                                                  | 1445.3 | 1441.7 | 1139.2 | 978.1  | 210.65*** | [103.70, 317.61]  |  |
| Consultation                                                     |        |        |        |        |           |                   |  |
| Age 3-4 years                                                    | 175.0  | 157.6  | 122.8  | 181.9  | -75.20*** | [-101.42, -48.97] |  |
| Age 5-12 years                                                   | 282.0  | 266.3  | 246.0  | 256.7  | -31.10*** | [-48.40, -13.81]  |  |
| Age 13-17 years                                                  | 182.4  | 154.9  | 112.3  | 145.3  | -30.48*** | [-46.65, -14.31]  |  |
| MH screening                                                     |        |        |        |        |           |                   |  |
| Age 3-4 years                                                    | 193.4  | 180.1  | 169.1  | 144.2  | 36.03**   | [12.96, 59.11]    |  |
| Age 5-12 years                                                   | 168.0  | 153.5  | 154.9  | 129.6  | 12.24     | [-0.19, 24.66]    |  |
| Age 13-17 years                                                  | 148.3  | 119.9  | 122.7  | 110.9  | -12.77    | [-26.68, 1.15]    |  |
| MH testing                                                       |        |        |        |        |           |                   |  |
| Age 3-4 years                                                    | 8.6    | 6.4    | 7.4    | 6.1    | -1.43     | [-7.26, 4.41]     |  |
| Age 5-12 years                                                   | 10.2   | 7.0    | 9.6    | 9.5    | -2.64*    | [-4.97, -0.31]    |  |
| Age 13-17 years                                                  | 9.0    | 4.0    | 3.4    | 4.8    | -4.93***  | [-6.84, -3.02]    |  |
| <b>Psychotropic medications, % patients</b>                      |        |        |        |        |           |                   |  |
| Any psychotropic medication use (>0% of days)                    |        |        |        |        |           |                   |  |
| Age 3-4 years                                                    | 1.8%   | 1.1%   | 1.3%   | 0.8%   | -0.1%     | [-0.9%, 0.7%]     |  |
| Age 5-12 years                                                   | 6.3%   | 6.6%   | 4.1%   | 5.0%   | -0.3%     | [-0.9%, 0.2%]     |  |
| Age 13-17 years                                                  | 6.2%   | 7.1%   | 5.2%   | 5.6%   | -0.5%     | [-1.3%, 0.3%]     |  |
| Any stimulant medication use (>0% of days)                       |        |        |        |        |           |                   |  |
| Age 3-4 years                                                    | 0.6%   | 0.7%   | 0.7%   | 0.4%   | 0.4%      | [-0.4%, 1.2%]     |  |
| Age 5-12 years                                                   | 4.4%   | 4.4%   | 2.6%   | 3.5%   | -0.5%**   | [-0.9%, -0.1%]    |  |
| Age 13-17 years                                                  | 2.7%   | 3.2%   | 2.2%   | 2.5%   | -0.5%     | [-1.1%, 0.01%]    |  |
| Polypharmacy (2+ psychotropic medications)                       |        |        |        |        |           |                   |  |
| Age 3-4 years                                                    | 0.1%   | 0.1%   | 0.2%   | 0.1%   | 0.1%      | [-1.3%, 1.5%]     |  |

|                                                                                        |       |       |       |       |           |                 |
|----------------------------------------------------------------------------------------|-------|-------|-------|-------|-----------|-----------------|
| Age 5-12 years                                                                         | 1.6%  | 1.8%  | 0.8%  | 1.2%  | -0.2%     | [-0.5%, 0.1%]   |
| Age 13-17 years                                                                        | 2.2%  | 2.3%  | 1.4%  | 2.0%  | -0.6%**   | [-1.1%, -0.2%]  |
| <b>Follow-up care measures,<br/>% patients</b>                                         |       |       |       |       |           |                 |
| Follow-up visit <sup>a</sup> after MH<br>ED visit (MH or self-harm<br>DX) <sup>b</sup> |       |       |       |       |           |                 |
| Age 3-4 years                                                                          | 0.0%  | 0.0%  | 0.0%  | 0.0%  | No sample |                 |
| Age 5-12 years                                                                         | 70.7% | 73.7% | 60.3% | 71.4% | -18.9%    | [-44.3%, 6.5%]  |
| Age 13-17 years                                                                        | 64.5% | 67.3% | 54.5% | 63.8% | 3.3%      | [-17.5%, 24%]   |
| Follow-up visit <sup>a</sup> after MH<br>hospitalization (MH DX) <sup>c</sup>          |       |       |       |       |           |                 |
| Age 3-4 years                                                                          | 0.0%  | 0.0%  | 0.0%  | 0.0%  | No sample |                 |
| Age 5-12 years                                                                         | 76.5% | 66.7% | 71.1% | 71.4% | 6.5%      | [-22.6%, 35.6%] |
| Age 13-17 years                                                                        | 65.6% | 60.9% | 62.8% | 59.3% | -15.2%    | [-50.9%, 20.5%] |

**eTable 5. Distribution of the Mean Number of Visits per Patient per Quarter**

| # admissions/visits per quarter | Inpatient admissions |         | Emergency department visits |         | Primary care visits |         |
|---------------------------------|----------------------|---------|-----------------------------|---------|---------------------|---------|
|                                 | Frequency            | Percent | Frequency                   | Percent | Frequency           | Percent |
| 0                               | 151,109              | 99.42   | 136,818                     | 90.01   | 91,941              | 60.49   |
| 1                               | 824                  | 0.54    | 12,495                      | 8.22    | 42,824              | 28.17   |
| 2                               | 51                   | 0.03    | 2,072                       | 1.36    | 12,118              | 7.97    |
| 3                               | 7                    | 0       | 419                         | 0.28    | 3,461               | 2.28    |
| 4                               | 2                    | 0       | 103                         | 0.07    | 1,096               | 0.72    |
| > 4                             | 2                    | 0       | 88                          | 0.05    | 555                 | 0.37    |
| Total                           | 151,995              | 100     | 151,995                     | 100     | 151,995             | 100     |

Note: Among 151,995 person-quarters in our final data, the table shows the distribution of sample by the number of healthcare utilization per quarter for inpatient admission, emergency department visit, and primary care visit.

**eTable 6. Distribution of the Mean Number of Visits With Mental Health Service Use per Patient per Quarter**

| # mental health service visits (any service) per quarter | Freq.   | Percent |
|----------------------------------------------------------|---------|---------|
| 0                                                        | 81,057  | 53.33   |
| 1                                                        | 33,095  | 21.77   |
| 2                                                        | 13,440  | 8.84    |
| 3                                                        | 6,163   | 4.05    |
| 4                                                        | 3,645   | 2.4     |
| 5                                                        | 2,221   | 1.46    |
| 6                                                        | 1,596   | 1.05    |
| 7                                                        | 1,236   | 0.81    |
| 8                                                        | 1,023   | 0.67    |
| 9                                                        | 830     | 0.55    |
| 10                                                       | 702     | 0.46    |
| 11                                                       | 608     | 0.4     |
| 12                                                       | 594     | 0.39    |
| 13                                                       | 502     | 0.33    |
| 14                                                       | 446     | 0.29    |
| 15                                                       | 349     | 0.23    |
| 16                                                       | 325     | 0.21    |
| 17                                                       | 272     | 0.18    |
| 18                                                       | 281     | 0.18    |
| 19                                                       | 212     | 0.14    |
| 20                                                       | 181     | 0.12    |
| 21                                                       | 197     | 0.13    |
| 22                                                       | 205     | 0.13    |
| 23                                                       | 154     | 0.1     |
| 24                                                       | 155     | 0.1     |
| 25                                                       | 132     | 0.09    |
| 26                                                       | 148     | 0.1     |
| 27                                                       | 117     | 0.08    |
| 28                                                       | 119     | 0.08    |
| 29                                                       | 118     | 0.08    |
| 30                                                       | 109     | 0.07    |
| > 30                                                     | 1763    | 1.07    |
| Total                                                    | 151,995 | 100     |

Note: Among 151,995 person-quarters in our final data, the table shows the distribution of sample by the number of any mental health service uses per quarter.

**eTable 7. Association Between TEAM UP and Whether or Not Patients Used “Any MH Service” Reported as %: Difference-in-Differences Results**

|                       | TEAM UP FQHCs |        | Comparison FQHCs |        | DID             |                |
|-----------------------|---------------|--------|------------------|--------|-----------------|----------------|
|                       | Pre           | Post   | Pre              | Post   | Marginal effect | 95% CI         |
| <b>N</b>              | 37,804        | 21,192 | 60,381           | 32,618 |                 |                |
| <b>MH service use</b> |               |        |                  |        |                 |                |
| Any service           | 27.0%         | 24.5%  | 23.0%            | 20.4%  | 0.3%            | [-0.5%, 1.2%]  |
| Therapy               | 12.4%         | 11.6%  | 9.3%             | 9.1%   | -0.4%           | [-0.9%, 0.2%]  |
| Consultation          | 4.6%          | 4.8%   | 3.7%             | 4.0%   | -0.2%           | [-0.6%, 0.2%]  |
| MH screening          | 16.5%         | 14.6%  | 14.8%            | 12.4%  | 0.7%            | [-0.1%, 1.5%]  |
| MH testing            | 0.4%          | 0.3%   | 0.4%             | 0.4%   | -0.2%**         | [-0.3%, -0.1%] |

Note: Pre- and post-estimates represent the % of having each MH service in the pre (2014-q22016)- versus the post (q32016-2017)- periods. The difference-in-difference estimates represent the interaction term between TEAM UP status and post-period status. 95% confidence interval (CI) in brackets. MH is mental health.

\*  $p < 0.05$ , \*\*  $p < 0.01$ , \*\*\*  $p < 0.001$

**eTable 8. Association Between TEAM UP and Whether or Not Patients Had “Any MH Service” as % Among Medicaid Enrollees With Any Mental Health Diagnosis at Baseline: Difference-in-Differences Results**

|                       | TEAM UP FQHCs |       | Comparison FQHCs |       | DID             |                |
|-----------------------|---------------|-------|------------------|-------|-----------------|----------------|
|                       | Pre           | Post  | Pre              | Post  | Marginal effect | 95% CI         |
| <b>N</b>              | 13,583        | 5,706 | 19,091           | 7,796 |                 |                |
| <b>MH service use</b> |               |       |                  |       |                 |                |
| Any service           | 46.5%         | 37.5% | 41.0%            | 32.7% | -0.4%           | [-2.3%, 1.4%]  |
| Therapy               | 34.1%         | 26.9% | 29.4%            | 22.9% | -0.2%           | [-1.7%, 1.4%]  |
| Consultation          | 12.9%         | 11.6% | 11.7%            | 10.3% | -0.1%           | [-1.2%, 1.1%]  |
| MH screening          | 17.6%         | 14.7% | 15.1%            | 12.3% | 0.4%            | [-1.1%, 1.9%]  |
| MH testing            | 1.2%          | 0.6%  | 1.2%             | 1.0%  | -0.4%*          | [-0.7%, -0.1%] |

Note: Pre- and post-estimates represent the % of having each MH service in the pre (2014-q22016)- versus the post (q32016-2017)- periods. The difference-in-difference estimates represent the interaction term between TEAM UP status and post-period status. 95% confidence interval (CI) in brackets. MH is mental health.

\*  $p < 0.05$ , \*\*  $p < 0.01$ , \*\*\*  $p < 0.001$

**eFigure 1. Time Trends in Inpatient Admissions Among Medicaid-Enrolled Children**

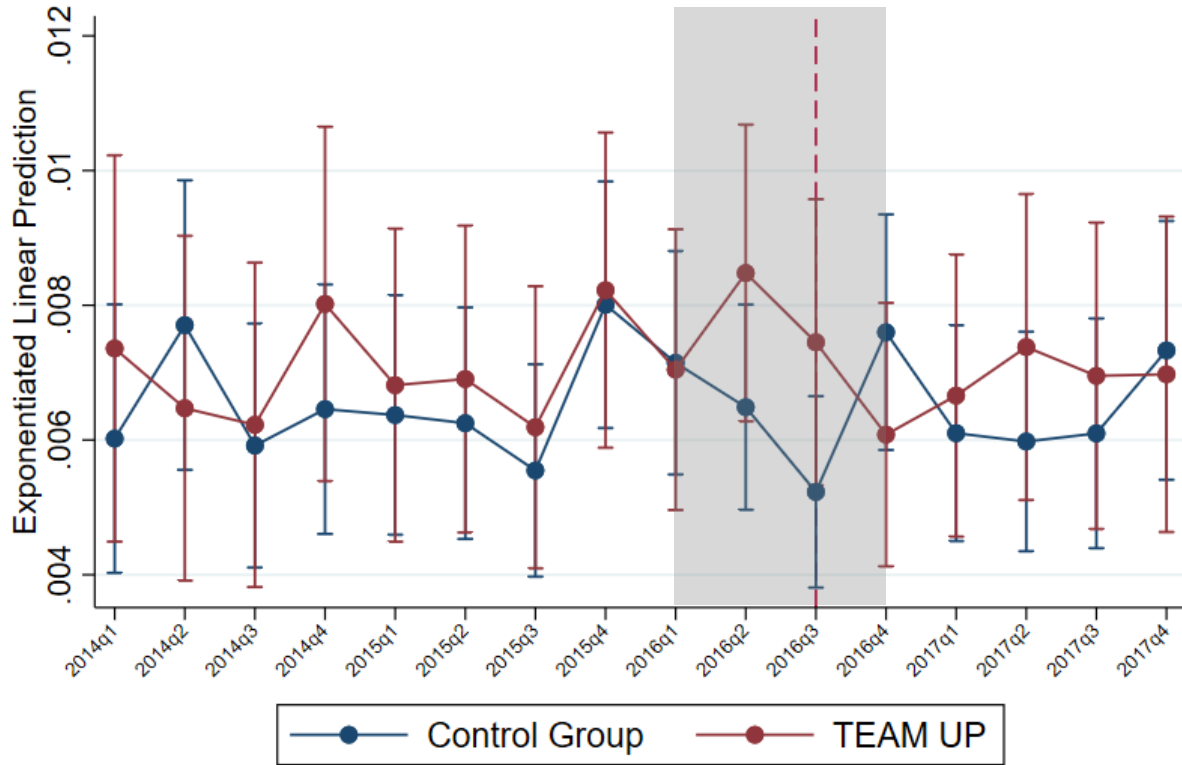

Note: This graph shows time trend in inpatient admissions among Medicaid-enrolled children.

**eFigure 2. Time Trends in Inpatient Admissions Among Medicaid-Enrolled Children With a Baseline Mental Health Diagnosis**

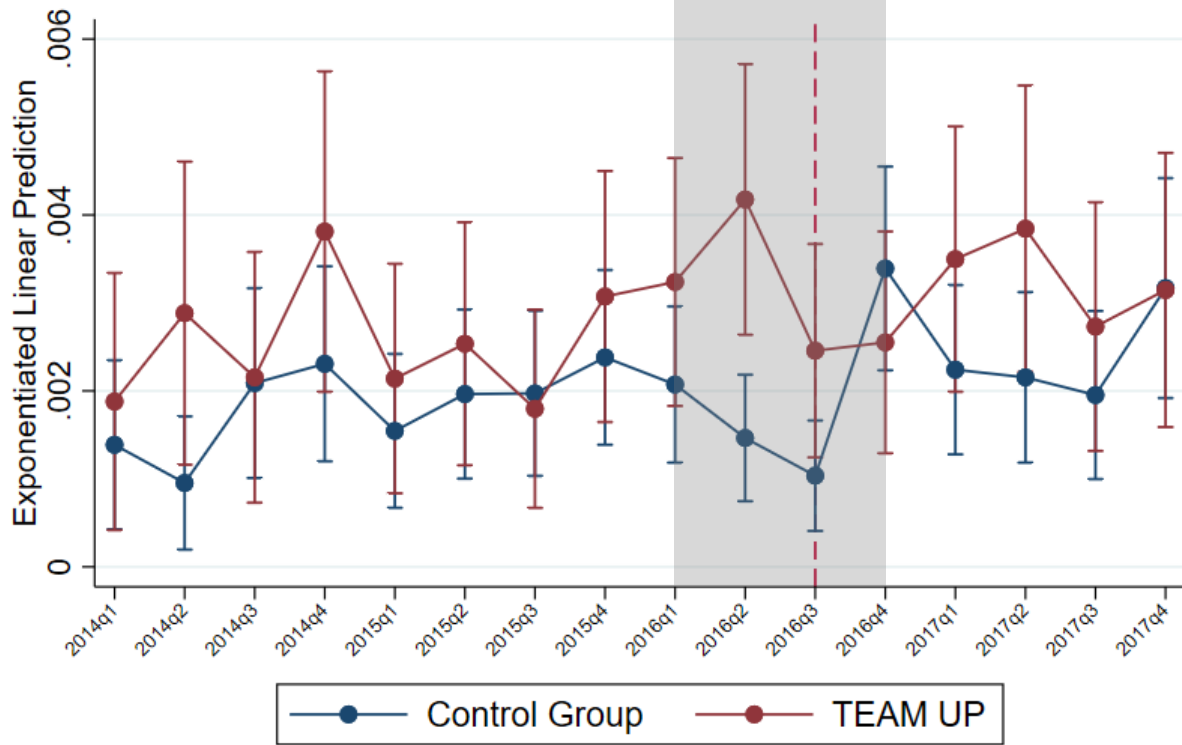

Note: This graph shows time trend in inpatient admissions with MH DX among Medicaid-enrolled children.



**eFigure 3. Time Trends in Emergency Department Visits Among Medicaid-Enrolled Children**

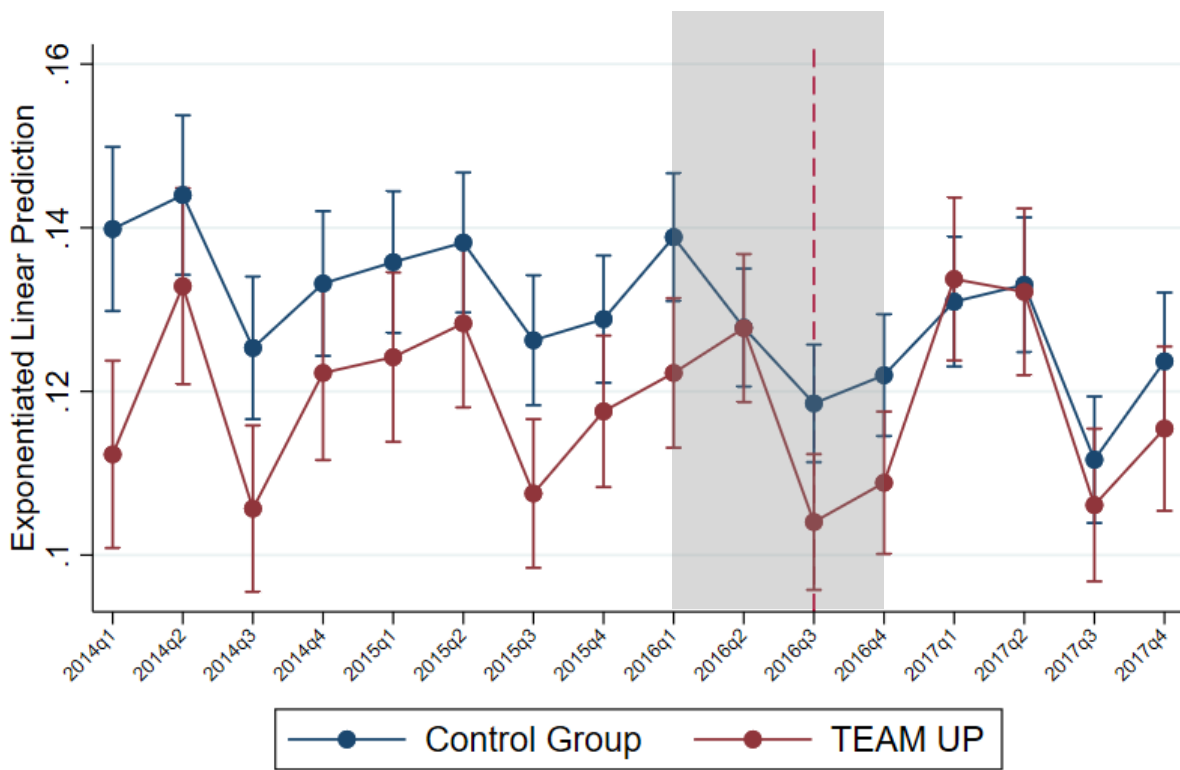

Note: This graph shows time trend in emergency department visits among Medicaid-enrolled children.

**eFigure 4. Time Trends in Emergency Department Visits Among Medicaid-Enrolled Children With a Baseline Mental Health Diagnosis**

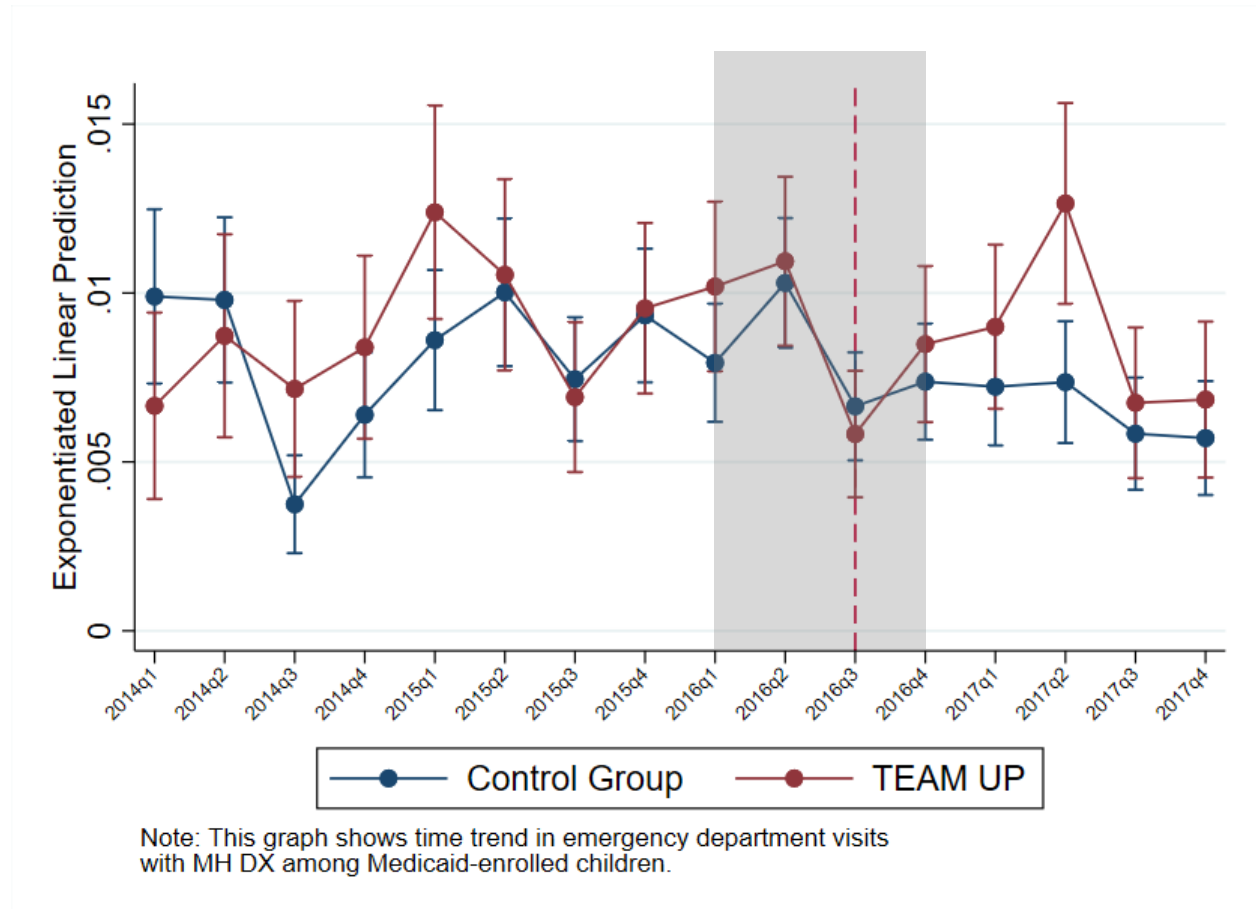

eFigure 5. Time Trends in Primary Care Visits Among Medicaid-Enrolled Children

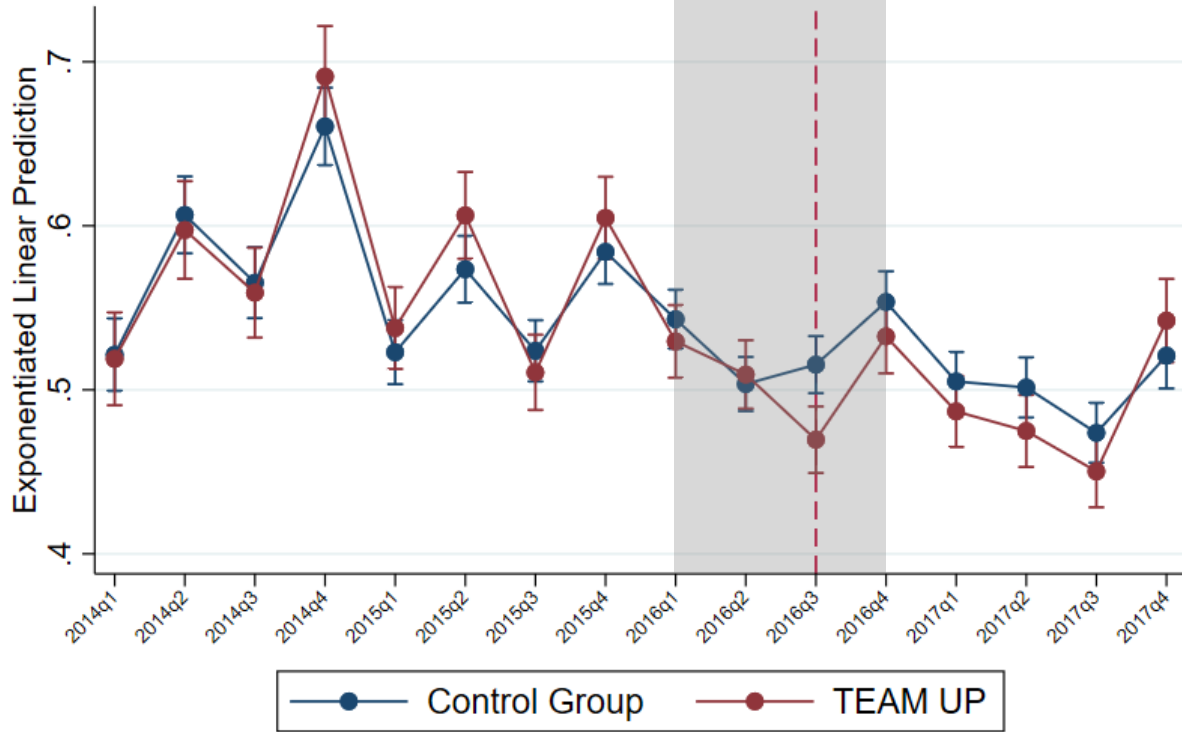

Note: This graph shows time trend in primary care visits among Medicaid-enrolled children.

**eFigure 6. Time Trends in Primary Care Visits Among Medicaid-Enrolled Children With a Baseline Mental Health Diagnosis**

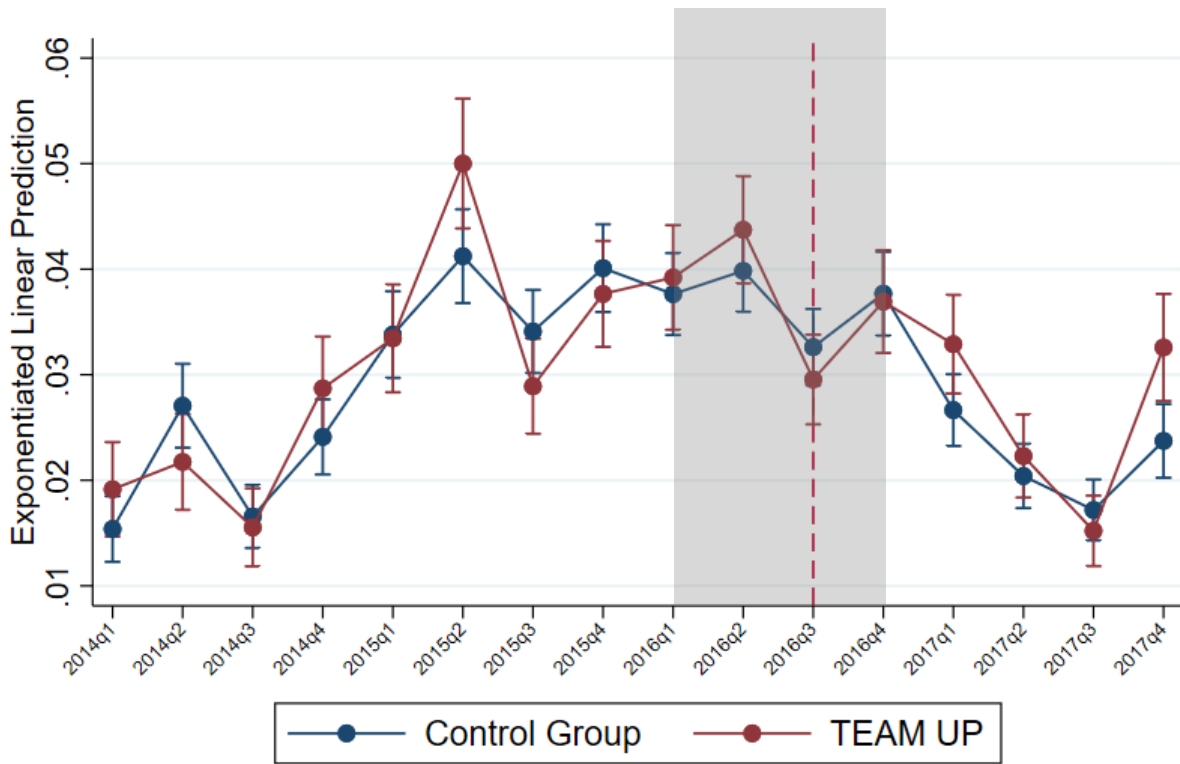

Note: This graph shows time trend in primary care visits with MH DX among Medicaid-enrolled children.

**eFigure 7. Time Trends in Any Mental Health Service Utilization Among Medicaid-Enrolled Children**

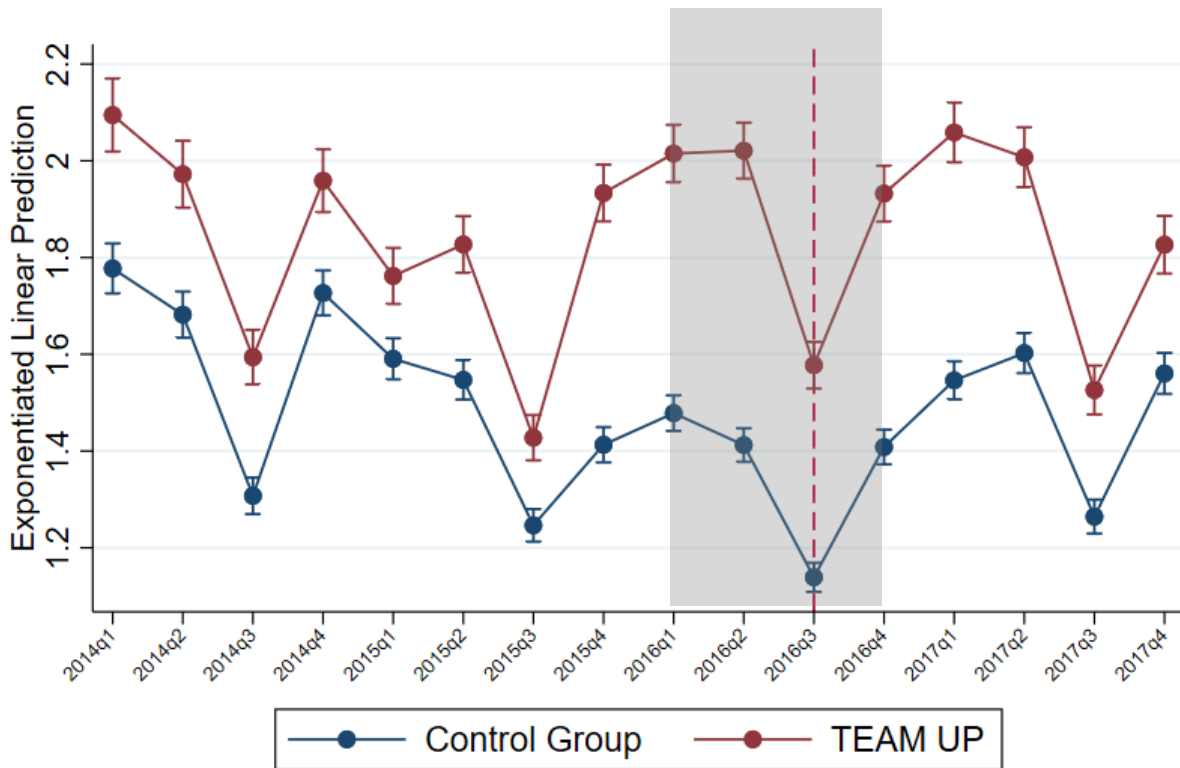

Note: This graph shows time trend in any mental health service utilization among Medicaid-enrolled children.

**eFigure 8. Time Trends in Mental Health Therapy Utilization Among Medicaid-Enrolled Children**

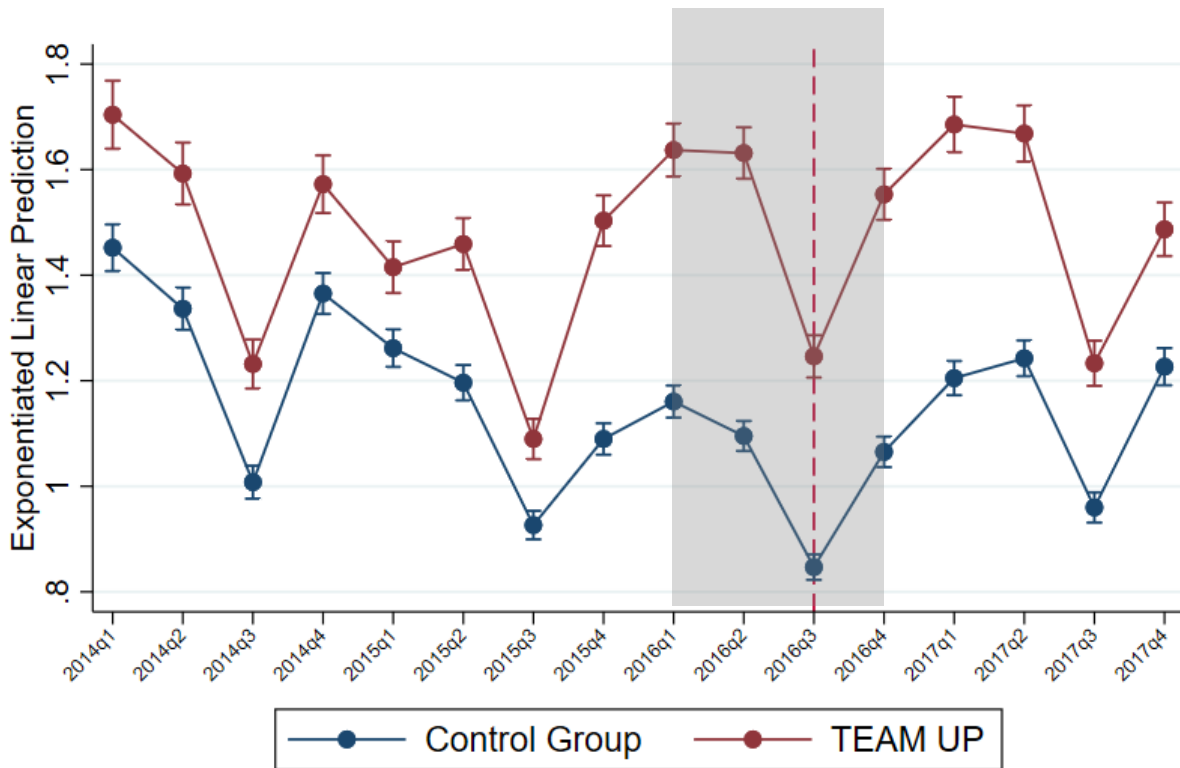

Note: This graph shows time trend in mental health therapy utilization among Medicaid-enrolled children.

**eFigure 9. Time Trends in Mental Health Consultation Utilization Among Medicaid-Enrolled Children**

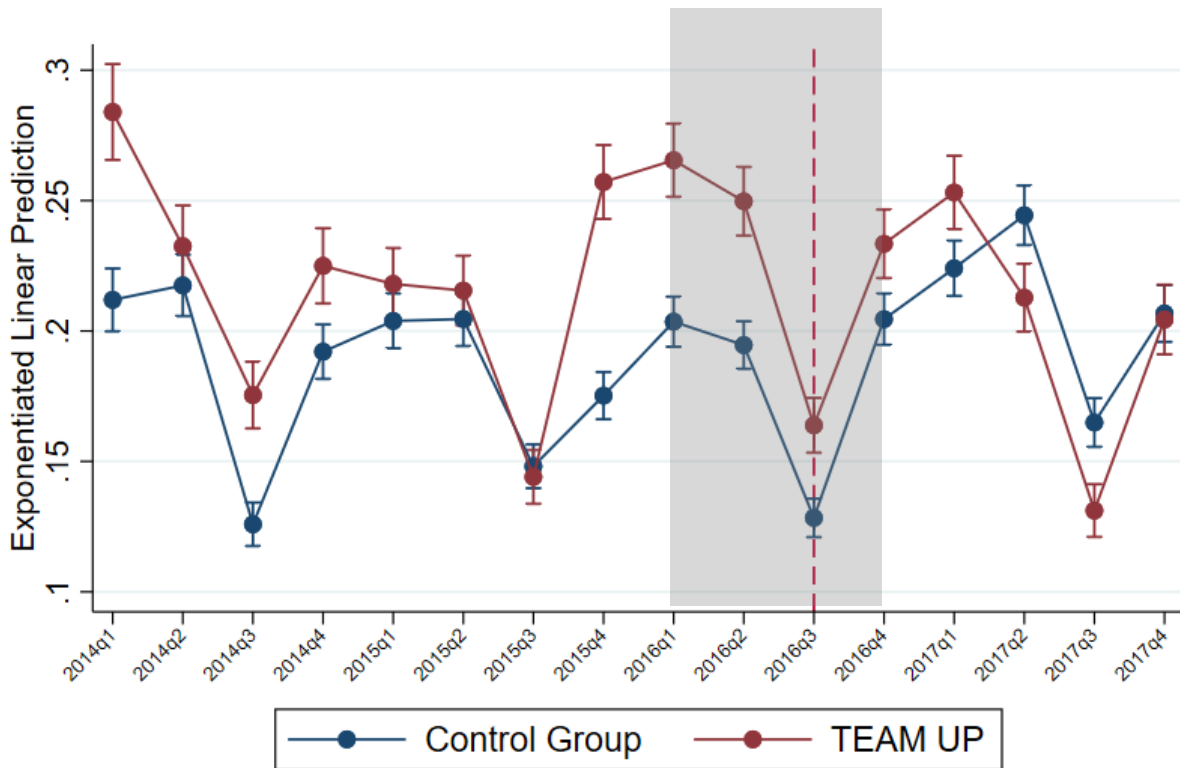

Note: This graph shows time trend in mental health consultation utilization among Medicaid-enrolled children.

**eFigure 10. Time Trends in Mental Health Testing Utilization Among Medicaid-Enrolled Children**

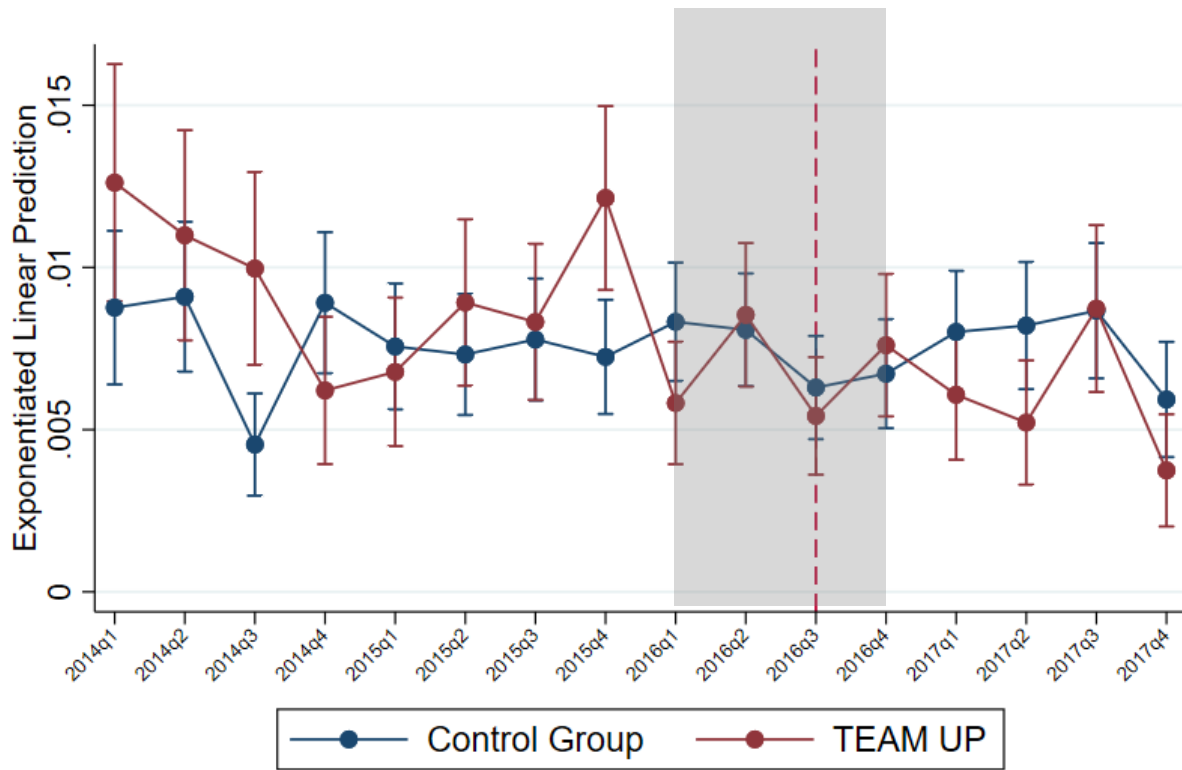

Note: This graph shows time trend in mental health testing utilization among Medicaid-enrolled children.



**eFigure 11. Time Trends in Mental Health Screening Utilization Among Medicaid-Enrolled Children**

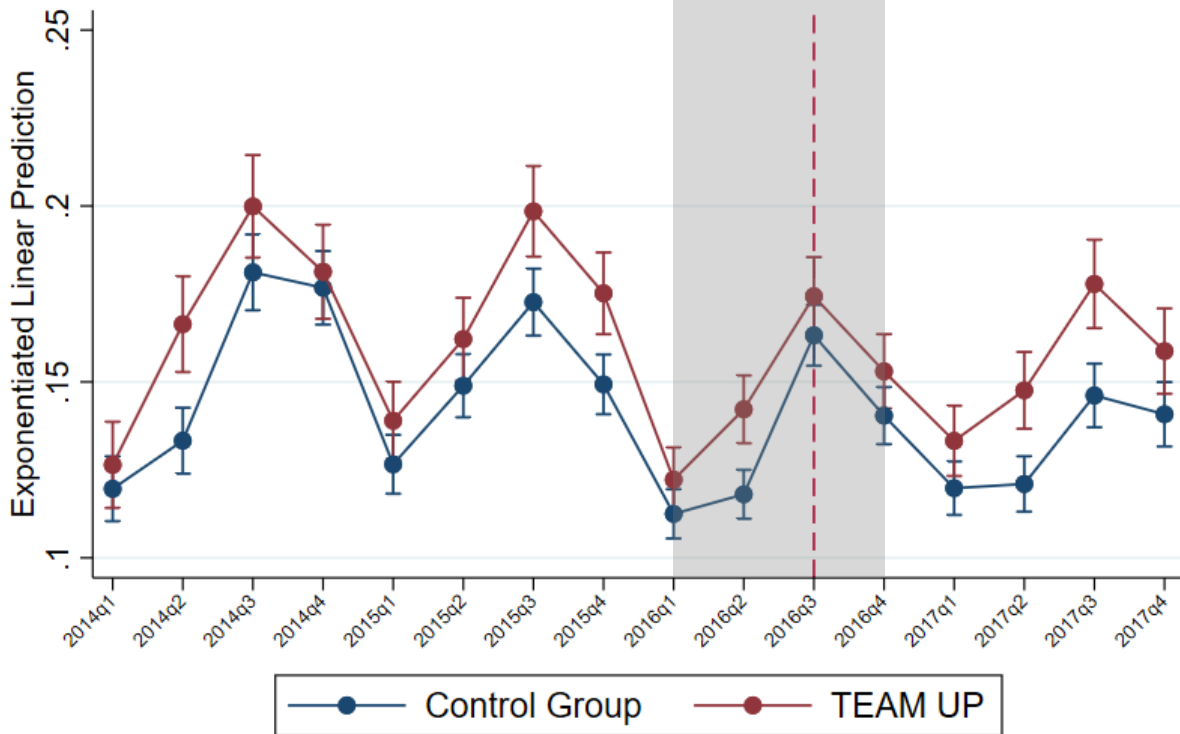

Note: This graph shows time trend in mental health screening utilization among Medicaid-enrolled children.

**eFigure 12. Time Trends of Any Psychotropic Medication Use (>0% of Days in Quarter) Among Medicaid-Enrolled Children**

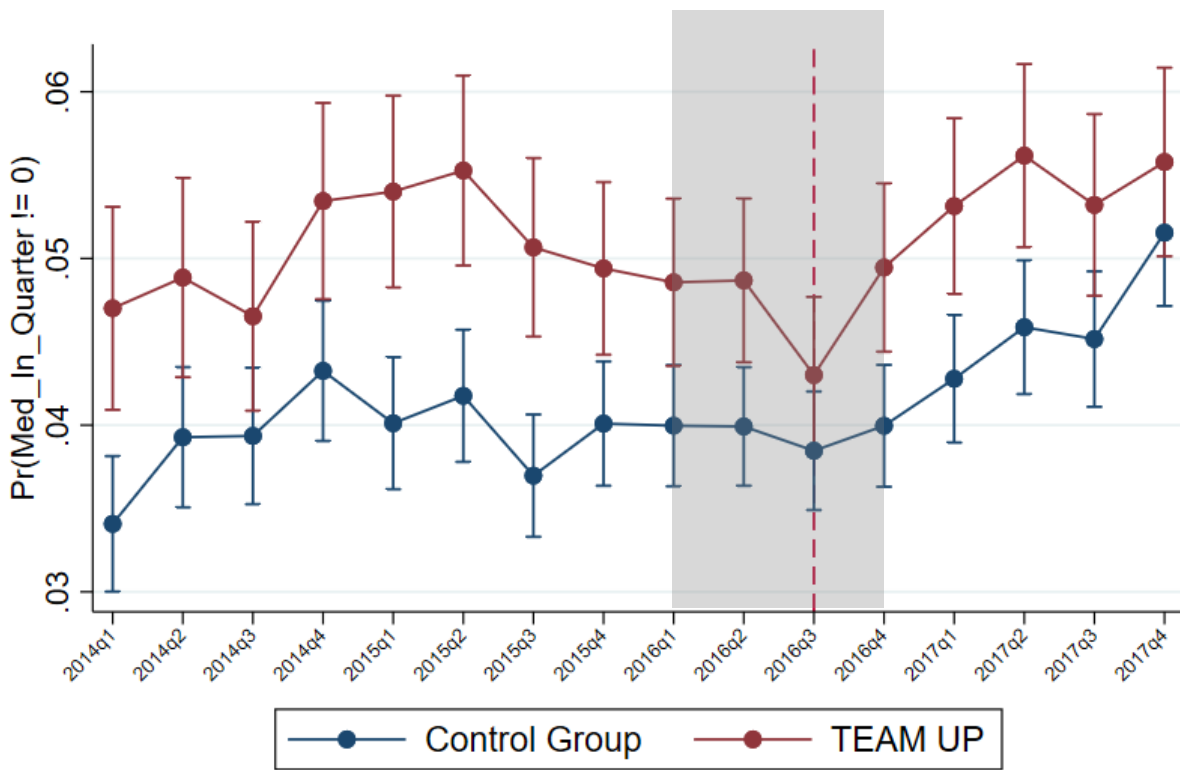

Note: This graph shows time trend in any psychotropic medication use (>0% of days in quarter) among Medicaid-enrolled children.

eFigure 13. Time Trends of Any Stimulant Use Among Medicaid-Enrolled Children

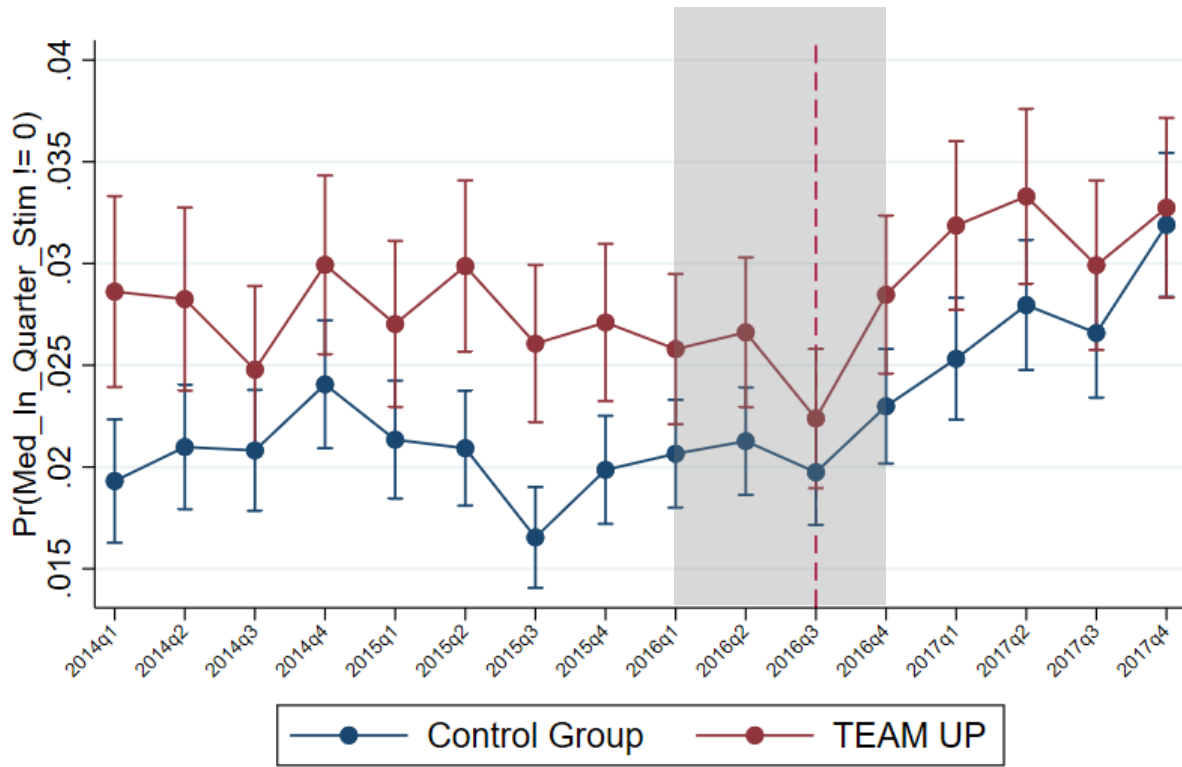

Note: This graph shows time trend in any stimulant use among Medicaid-enrolled children.

**eFigure 14. Time Trends of Polypharmacy (Having > 1 Class of Psychotropic Medication) Among Medicaid-Enrolled Children**

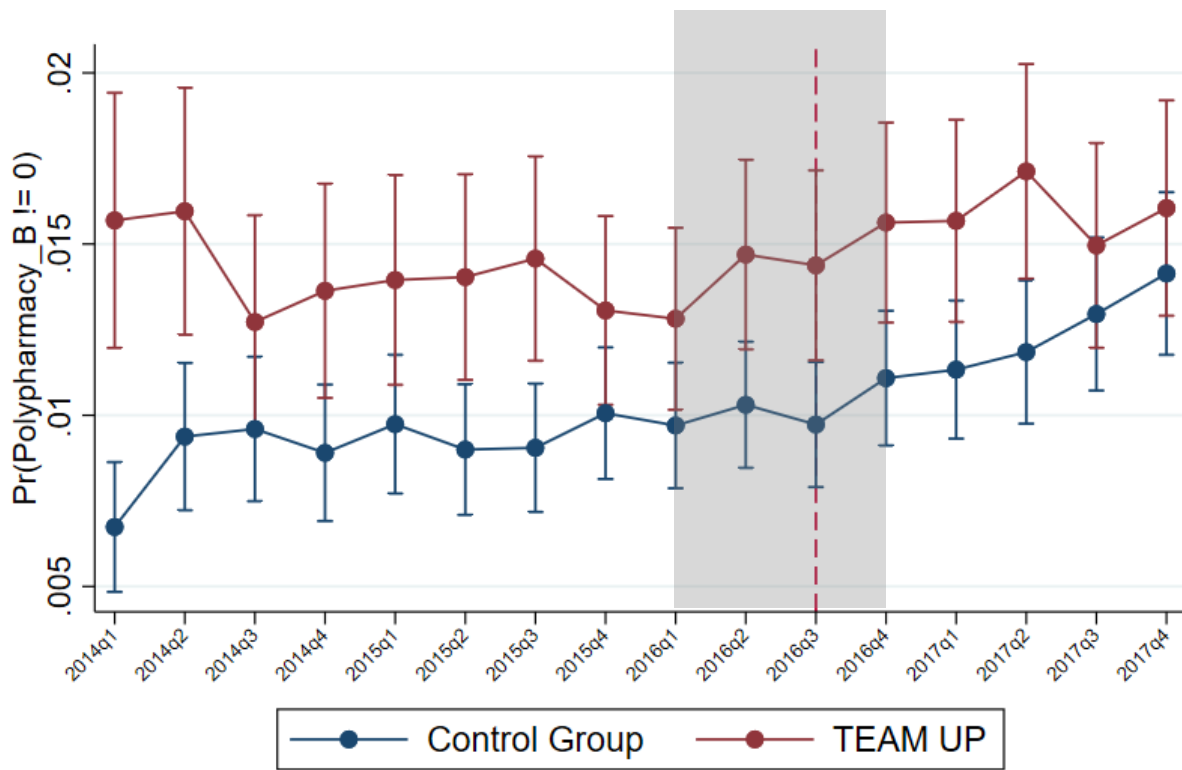

Note: This graph shows time trend in polypharmacy (having > 1 class of psychotropic medication) among Medicaid-enrolled children.

**eFigure 15. Time Trends of 7-Days FU After ED Visit for MH/Intentional Self-Harm DX (Primary)**

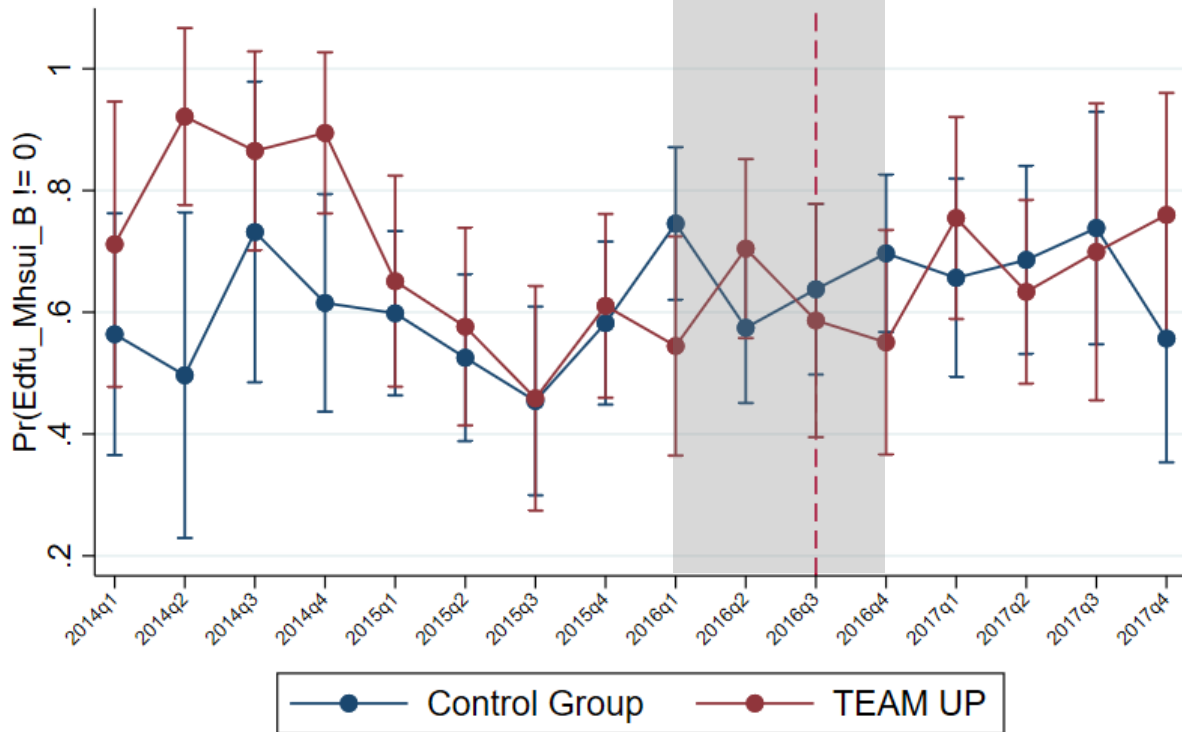

Note: This graph shows time trend in 7-days follow-up after emergency department visit for mental health/intentional self-harm primary diagnoses among Medicaid-enrolled children.

eFigure 16. Time Trends of 7-Days FU After Hospitalization for MH DX (Primary)

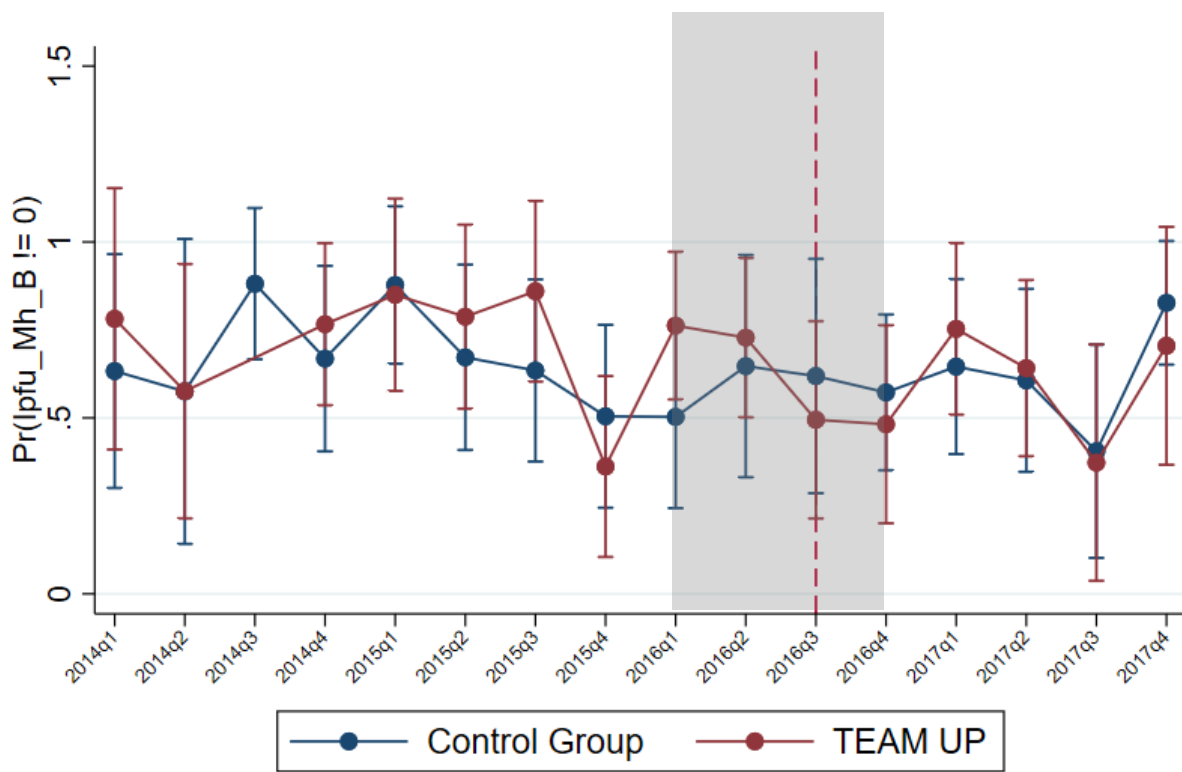

Note: This graph shows time trend in 7-days follow-up after hospitalization for mental health primary diagnoses among Medicaid-enrolled children.
