# Supplementary material for: Association of Integrating Mental Health Into Pediatric Primary Care at Federally Qualified Health Centers With Utilization and Follow-up Care
Source: PubMed Central journal article supplement (PMC10134009; doi:10.1001/jamanetworkopen.2023.9990), 2023-04-26
Supplement: jamanetwopen-e239990-s002.pdf [file jamanetwopen-e239990-s002.pdf]

## Data Sharing Statement

Kim. Association of Integrating Mental Health Into Pediatric Primary Care at Federally Qualified Health Centers With Utilization and Follow-up Care. *JAMA Netw Open*. Published April 26, 2023. doi:10.1001/jamanetworkopen.2023.9990

### Data

**Data available:** No

### Additional Information

**Explanation for why data not available:** Per our DUA with the state, we cannot share these claims data. All interested researchers must obtain data through CHIA and have appropriate data management plan and security requirements in place.
